# Supplementary material for: Genome sequence of Plasmopara viticola and insight into the pathogenic mechanism
Source: PubMed Central journal article supplement (PMC5394536; doi:10.1038/srep46553), 2017-04-18

# **Genome sequence of *Plasmopara viticola* and insight into the pathogenic mechanism**

**Ling Yin<sup>1,3, ¶</sup>, Yunhe An<sup>1,2, ¶</sup>, Junjie Qu<sup>3, ¶</sup>, Xinlong Li<sup>1</sup>, Yali Zhang<sup>1</sup>, Ian Dry<sup>5</sup>,  
Huijun Wu<sup>2\*</sup>, Jiang Lu<sup>1,4\*\*</sup>**

<sup>1</sup>College of Food Science and Nutritional Engineering, China Agricultural University, Beijing 100083, China.

<sup>2</sup>Beijing Center for Physical and Chemical Analysis, Beijing 100089, China.

<sup>3</sup>Guangxi Crop Genetic Improvement and Biotechnology Laboratory, Guangxi Academy of Agricultural Sciences, Nanning 530007, China.

<sup>4</sup>Center for Viticulture and Enology, School of Agriculture and Biology, Shanghai Jiao Tong University, Shanghai 200024, China

<sup>5</sup>CSIRO Agriculture & Food, Wine Innovation West Building, Hartley Grove, Urrbrae SA 5064, Australia.

¶These authors contributed equally to this work.

\*Co-corresponding author;

\*\*To whom corresponding should be addressed, E-mail: [jiang.lu@sjtu.edu.cn](mailto:jiang.lu@sjtu.edu.cn)

## Supporting information

**Supplementary Table S1.** Summary of sequencing data information of *P. viticola* isolate ‘JL-7-2’.

**Supplementary Table S2.** Comparison of *P. viticola* genome assembly statistics using Illumina sequence data only or Illumina/PacBio hybrid assembly.

**Supplementary Table S3.** Comparison of genome assembly statistics of two sequenced *P. viticola* isolates.

**Supplementary Table S4.** BUSCO analysis of the genome assembly.

**Supplementary Table S5. Transcription of predicted *P. viticola* genes during infection.** Number of RNA-Seq reads detected in RNA extracted expressed genes of *P. viticola* isolates ‘JL-7-2’, ‘ZJ-1-1’ and ‘CSIRO-L-2’ during infection of grape leaves. Reads for Chinese isolates ‘JL-7-2’ and ‘ZJ-1-1’ come from RNA-Seq analysis of a mixed RNA sample comprised of equal amounts of total RNA extracted from infected *V. vinifera* cv. Thompson seedless leaves sampled at 24 hpi, 48 hpi and 72 hpi. In contrast, data given for the Australian isolate ‘CSIRO-L-2’ represents the highest number of RNA-Seq reads obtained from RNA sampled at any of the sampling time points of 12 hpi, 24 hpi, 48 hpi, 72 hpi or 96 hpi of *V. vinifera* cv. Cabernet sauvignon leaves. Therefore direct comparisons between the number of reads obtained for each *P. viticola* transcript cannot be made between the Chinese and Australian isolates. Predicted RXLR effectors are highlighted in yellow.

**Supplementary Table S6.** Summary of repeat elements in the *P. viticola* genome.

**Supplementary Table S7.** Candidate RXLR/Q effectors encoded in the *P. viticola* genome.

**Supplementary Table S8.** Gene density and percentage of repeat elements in the *P. viticola* genome and in scaffolds with RXLR clusters.

**Supplementary Table S9.** Candidate CRN effectors encoded in the *P. viticola* genome.

**Supplementary Table S10.** Predicted pathogenicity proteins within the *P. viticola* secretome. BLAST analysis was performed with the entire *P. viticola* secretome against the Pathogen-Host Interaction Database (PHI database).

**Supplementary Table S11.** Putative carbohydrate-active enzyme (CAZyme) classes encoded in the *P. viticola* secretome as predicted using the dbCAN database.

**Supplementary Table S12.** Differentially expressed genes in *P. viticola* isolate 'ZJ-1-1' during infection of *V. amurensis* cv. Shuanghong.

**Supplementary Table S13.** Protein identity comparison between all proteins and secreted proteins predicted in *P. viticola* genome.

**Supplementary Table S14.** Presence and absence of important metabolic enzymes in *P. viticola* and comparison with *Phytophthora* species, other downy mildews and *A. laibachii*. Red indicates absence and green indicates presence of genes. Genes present for all the organisms below were annotated by blast to NCBI non-redundant protein database or KEGG database and genes present in *P. viticola* were also validated by PCR and transcriptome data. The primers were listed in Supplementary Table S15.

**Supplementary Table S15.** Primers were used to validate the presence of enzymes related to nitrogen,

sulfur and thiamine metabolic pathways by PCR amplification from genomic DNA of 'JL-7-2' isolate.

**Supplementary Table S1.** Summary of sequencing data information of *P. viticola* isolate 'JL-7-2'.

| Data Type  | Insert Size | Raw reads  | Trimmed reads | Sequence Depth |
|------------|-------------|------------|---------------|----------------|
|            | 180 bp      | 76,363,088 | 73,311,382    | 66.1X          |
| Illumina   | 500 bp      | 48,061,012 | 44,068,164    | 38.6X          |
| Paired-end | 800bp       | 47,564,330 | 23,866,398    | 20.4X          |
|            | 1kb         | 51,285,508 | 15,151,256    | 12.6X          |
| Illumina   | 3kb         | 31,320,134 | 23,352,680    | 21.0x          |
| Mate pair  | 6kb         | 12,799,230 | 11,471,298    | 10.2x          |
| PacBio     | -           | 2,404,672  | 845,976       | 38.0X          |
| Total      | -           |            |               | 207.0X         |

**Supplementary Table S2.** Comparison of *P. viticola* genome assembly statistics using Illumina sequence data only or Illumina/PacBio hybrid assembly.

|                            | Illumina Only | Illumina/PacBio assembly |
|----------------------------|---------------|--------------------------|
| Genome assembly size       | 103,157,395   | 101,296,116              |
| Number of ambiguous bp     | 28,824,422    | 16,928,280               |
| The percentage of gaps     | 27.94%        | 16.71%                   |
| N50 of scaffold            | 160,129       | 172,266                  |
| Length of largest scaffold | 692,625       | 805,677                  |
| Total number of scaffolds  | 2793          | 2165                     |

**Supplementary Table S3.** Comparison of genome assembly statistics of two sequenced *P. viticola* isolates.

| <i>P. viticola</i> Isolates       | JL-7-2 (China, present work) | INRA-PV221 (France <sup>28</sup> ) |
|-----------------------------------|------------------------------|------------------------------------|
| Estimated genome size (without N) | 84.37 Mb                     | 72.74 Mb                           |
| Number of scaffolds               | 2,165 (>500 bp)              | 1,883 (>1000 bp)                   |
| Scaffold N50 size (kb)            | 172.3 kb                     | 180.6 Kb                           |
| Longest scaffold (kb)             | 805.7                        | 763.5                              |
| GC content of whole genome (%)    | 45%                          | 44.3%                              |
| % Repeats                         | 25.6%                        | 29.8%                              |
| CEGMA/BUSCO (with partials)       | 97% /90%                     | 95%/na                             |

**Supplementary Table S4.** Comparison of different oomycete genome assembly by BUSCO analysis. A total of 429 conserved eukaryotes proteins were searched from the assembled *P. viticola* and other 5 oomycete genomes.

| Species                 | Complete | Duplicated | Fragmented | Missing |
|-------------------------|----------|------------|------------|---------|
| <i>P. viticola</i>      | 84%      | 46%        | 6%         | 9.50%   |
| <i>H. arabidopsidis</i> | 79%      | 32%        | 8.80%      | 11%     |
| <i>P. halstedii</i>     | 90%      | 24%        | 4.10%      | 5.30%   |
| <i>P. infestans</i>     | 90%      | 29%        | 2%         | 6.90%   |
| <i>P. sojae</i>         | 88%      | 24%        | 3.20%      | 8.30%   |

**Supplementary Table S5. Transcription of predicted *P. viticola* genes during infection.** Number of RNA-Seq reads detected in RNA extracted expressed genes of *P. viticola* isolates ‘JL-7-2’, ‘ZJ-1-1’ and ‘CSIRO-L-2’ during infection of grape leaves. Reads for Chinese isolates ‘JL-7-2’ and ‘ZJ-1-1’ come from RNA-Seq analysis of a mixed RNA sample comprised of equal amounts of total RNA extracted from infected *V. vinifera* cv. Thompson seedless leaves sampled at 24 hpi, 48 hpi and 72 hpi. In contrast, data given for the Australian isolate ‘CSIRO-L-2’ represents the highest number of RNA-Seq reads obtained from RNA sampled at any of the sampling time points of 12 hpi, 24 hpi, 48 hpi, 72 hpi or 96 hpi of *V. vinifera* cv. Cabernet sauvignon leaves. Therefore direct comparisons between the number of reads obtained for each *P. viticola* transcript cannot be made between the Chinese and Australian isolates. Predicted RXLR effectors are highlighted in yellow.

( See separate excel file)

**Supplementary Table S6.** Summary of repeat elements in the *P. viticola* genome.

| Repeat Elements  | Percentage    | Number of bases |
|------------------|---------------|-----------------|
| SINE             | 0.21%         | 208618          |
| Unknown          | 6.55%         | 6631664         |
| Simple_repeat    | 0.25%         | 253996          |
| rRNA             | 0.08%         | 79398           |
| RC/Helitron      | 0.02%         | 19915           |
| LTR/Gypsy        | 10.39%        | 10531330        |
| LTR/Copia        | 3.15%         | 3194722         |
| Low_complexity   | 0.03%         | 29963           |
| DNA/TcMar-Tc2    | -             | -               |
| LINE/RTE-X       | 0.20%         | 206820          |
| LINE/RTE-BovB    | 0.33%         | 336879          |
| LINE/R2          | 0.02%         | 23845           |
| LINE/Penelope    | 0.04%         | 40107           |
| DNA/TcMar-Pogo   | -             | -               |
| LTR/Ngaro        | -             | -               |
| LINE/L1-Tx1      | 1.08%         | 1096284         |
| LINE/L1          | 0.28%         | 283826          |
| LINE/R1          | -             | -               |
| LINE/telomeric   | -             | -               |
| DNA/TcMar-Tc1    | -             | -               |
| LINE/Jockey      | 0.11%         | 115846          |
| DNA/Harbinger    | -             | -               |
| DNA/TcMar-Tigger | 0.03%         | 32269           |
| DNA/TcMar-Fot1   | 0.07%         | 74427           |
| DNA/TcMar-       | -             | -               |
| DNA/Sola         | 0.14%         | 137774          |
| DNA/MuLE-MuDR    | 0.68%         | 690357          |
| DNA/Maverick     | 1.61%         | 1633176         |
| DNA/hAT-hobo     | 0.02%         | 18627           |
| DNA/hAT-Ac       | 0.09%         | 93893           |
| DNA/hAT-Charlie  | -             | -               |
| DNA/hAT-Tag1     | -             | -               |
| DNA/hAT-Tip100   | -             | -               |
| DNA/Crypton      | 0.15%         | 149261          |
| <b>Total</b>     | <b>25.6 %</b> | <b>25882997</b> |

**Supplementary Table S7.** Candidate RXLR/Q effectors encoded in the *P. viticola* genome.

(See separate excel file)

**Supplementary Table S8.** Gene density and percentage of repeat elements in the *P. viticola* genome and in scaffolds with RXLR clusters.

|                                          | Gene Density<br>(# gene per Mb) | Percentage of repeat<br>elements |
|------------------------------------------|---------------------------------|----------------------------------|
| Seven scaffolds containing RXLR clusters | 139                             | 36.09%                           |
| All <i>P. viticola</i> genome scaffolds  | 176                             | 25.55%                           |

**Supplementary Table S9.** Candidate CRN effectors in the *P. viticola* genome.

(See separate excel file)

**Supplementary Table S10.** Predicted pathogenicity proteins within the *P. viticola* secretome. BLAST analysis was performed with the entire *P. viticola* secretome against the Pathogen-Host Interaction Database (PHI database).

(See separate excel file)



**Supplementary Table S11.** Putative carbohydrate-active enzyme (CAZyme) classes encoded in the *P. viticola* secretome as predicted using the dbCAN database.

|                                            | CAZy families                     | Number | Total number |
|--------------------------------------------|-----------------------------------|--------|--------------|
| <b>Auxiliary Activities (AAs)</b>          | AA10                              | 1      | 4            |
|                                            | AA7                               | 1      |              |
|                                            | AA7                               | 1      |              |
|                                            | AA8                               | 1      |              |
| <b>Carbohydrate-Binding Modules (CBMs)</b> | CBM1                              | 4      | 9            |
|                                            | CBM13                             | 1      |              |
|                                            | CBM15                             | 1      |              |
|                                            | CBM50                             | 1      |              |
|                                            | CBM63                             | 1      |              |
|                                            | CBM9                              | 1      |              |
| <b>Carbohydrate Esterases (CEs)</b>        | CE1                               | 4      | 16           |
|                                            | CE10                              | 2      |              |
|                                            | CE13                              | 1      |              |
|                                            | CE4                               | 2      |              |
|                                            | CE5                               | 1      |              |
|                                            | CE8                               | 6      |              |
| <b>Glycoside Hydrolases(GHs)</b>           | GH102                             | 1      | 60           |
|                                            | GH109                             | 1      |              |
|                                            | GH131                             | 13     |              |
|                                            | GH17                              | 9      |              |
|                                            | GH19                              | 3      |              |
|                                            | GH23                              | 2      |              |
|                                            | GH28                              | 1      |              |
|                                            | GH3                               | 5      |              |
|                                            | GH30                              | 1      |              |
|                                            | GH32                              | 2      |              |
|                                            | GH43                              | 1      |              |
|                                            | GH5                               | 3      |              |
|                                            | GH6                               | 13     |              |
|                                            | GH7                               | 1      |              |
|                                            | GH72                              | 4      |              |
|                                            | <b>Glycosyltransferases (GTs)</b> | GT31   |              |
| GT4                                        |                                   | 2      |              |
| GT71                                       |                                   | 1      |              |
| <b>Polysaccharide lyases (PLs)</b>         | PL22                              | 1      | 1            |

**Supplementary Table S12.** Differentially expressed genes in *P. viticola* isolate ‘ZJ-1-1’ during infection of *V. amurensis* cv. Shuanghong.

(See separate excel file)

**Supplementary Table S13.** Amino acid identity comparison between all proteins and secreted proteins predicted in *P. viticola* compared to other oomycete genomes.

| >60% amino acid identity                 | <i>P. halstedii</i> | <i>P. infestans</i> | <i>P. sojae</i> | <i>H. arabidopsidis</i> |
|------------------------------------------|---------------------|---------------------|-----------------|-------------------------|
| All proteins ( <i>P. viticola</i> )      | 9657 (56.8%)        | 8545 (50.2%)        | 8164(50.0%)     | 6035 (35.5%)            |
| Secreted proteins ( <i>P. viticola</i> ) | 733 (43.5%)         | 698 (41.4%)         | 672 (39.9%)     | 426 (25.3%)             |

**Supplementary Table S14.** Presence and absence of important metabolic enzymes in *P. viticola* and comparison with *Phytophthora* species, other downy mildews and *A. laibachii*. Red indicates absence and green indicates presence of genes. Genes present for all the organisms below were annotated by blast to NCBI non-redundant protein database or KEGG database and genes present in *P. viticola* were also validated by PCR and transcriptome data. The primers were listed in Supplementary Table S14.

|                             | <i>P. viticola</i> | <i>P. halstedii</i> <sup>1</sup> | <i>H. arabidopsidis</i> <sup>2</sup> | <i>P. sojae</i> <sup>2</sup> | <i>P. infestans</i> <sup>2</sup> | <i>A.laibachii</i> <sup>3</sup> |
|-----------------------------|--------------------|----------------------------------|--------------------------------------|------------------------------|----------------------------------|---------------------------------|
| Nitrate reductase           | Pv11323            | Phal04323                        | none                                 | Ps140563                     | PITG_13012.1                     | none                            |
| Nitrite reductase           | none               | none                             | none                                 | Ps140562                     | PITG_13013.1                     | none                            |
| Nitrate transporter         | Pv07654            | Phal07021                        | none                                 | Ps140564                     | PITG_13011.1                     | CCA24412                        |
| Sulphite oxidase            | Pv02147<br>Pv10357 | Phal16715<br>Phal03654           | Ha812582                             | Ps250369                     | PITG_12342.1                     | none                            |
| Sulphite reductase          | none               | none                             | none                                 | Ps139488<br>Ps139493         | PITG_19263.1<br>PITG_18187.1     | none                            |
| Cysteine synthetase         | Pv02771<br>Pv05868 | Phal08105                        | Ha814750                             | Ps109172<br>Ps109175         | PITG_12727.1<br>PITG_12725.1     | none                            |
| Thiamine-phosphate synthase | none               | none                             | none                                 | none                         | none                             | none                            |
| Thiamine pyrophosphokinase  | Pv08978<br>Pv10004 | Phal05670                        | Ha803592                             | Ps565547                     | PITG_07866.1                     | CCA24794                        |

1 Gene IDs from the Broad Institute Database: <http://www.broadinstitute.org>.

2 Gene IDs from the VBI Microbial Database: [vmd.vbi.vt.edu](http://vmd.vbi.vt.edu).

3 Gene IDs from <http://dataportal-senckenberg.de/database/metacat/rsharma.26.2/bikf>.

**Supplementary Table S15.** Primers were used to validate the presence of enzymes related to nitrogen, sulfur and thiamine metabolic pathways by PCR amplification from genomic DNA of 'JL-7-2' isolate.

| Primers   | Sequences (5'to3')        |
|-----------|---------------------------|
| Pv11323-F | GTGGAACAAGAGTGGCTGGATACGG |
| Pv11323-R | GTCCAAGACACTCCAGCA        |
| Pv07654-F | ATGCCACAAAGTGCATCGTAC     |
| Pv07654-R | TTACTCGATAGGCGCTAGTTG     |
| Pv08978-F | TGTTATCGGACGACTA          |
| Pv08978-R | GATGCCACCACTTCTACT        |
| Pv10004-F | GTTACTAAAGAGGGCGAAAG      |
| Pv10004-R | AGACGCAGTGAGTCCAAAT       |

**Figure S1.** Genomic distribution of contig length (N length) versus contig number (N number). N lengths were calculated by ordering all sequences according to their length and then adding the length from longest to shortest until the summed length exceeded 10% (N10), 20% (N20), etc., up to 100% (N100) of the assembled contigs. Plotting the N length versus the N number (number of contigs in each N category) indicates that 90% of the assembled genome show high continuity, while the last 10% are highly fragmented.

**Figure S2.** Identification of single copy core eukaryotic orthologous genes (CEGs) by the CEGMA pipeline. Group 1 represents the least conserved of the 248 core eukaryotic genes, with the degree of conservation increasing in subsequent groups through Group 4.

**Figure S3. Highly conserved RXLR effectors identified in multiple oomycete species.** Multiple sequence alignment of two conserved PvRXLRs (a) and one PvCRN (b) between different oomycete species. The RXLR and dEER motifs are indicated with a black boxes. The alignment was constructed using BioEdit3.3.19.0 software. The threshold (%) for shading was set at 50. Similar amino acid residues are shaded grey and identical amino acid residues are shaded black.

**Figure S4.** Molecular divergence (a) and phylogenetic relationship (b) between *P. viticola* and other species based on pairwise comparisons of the one-to-one orthologues. In the figure (a), the cumulative frequencies of amino acid identity across each set of potential orthologous pairs is presented.

Figure S1.

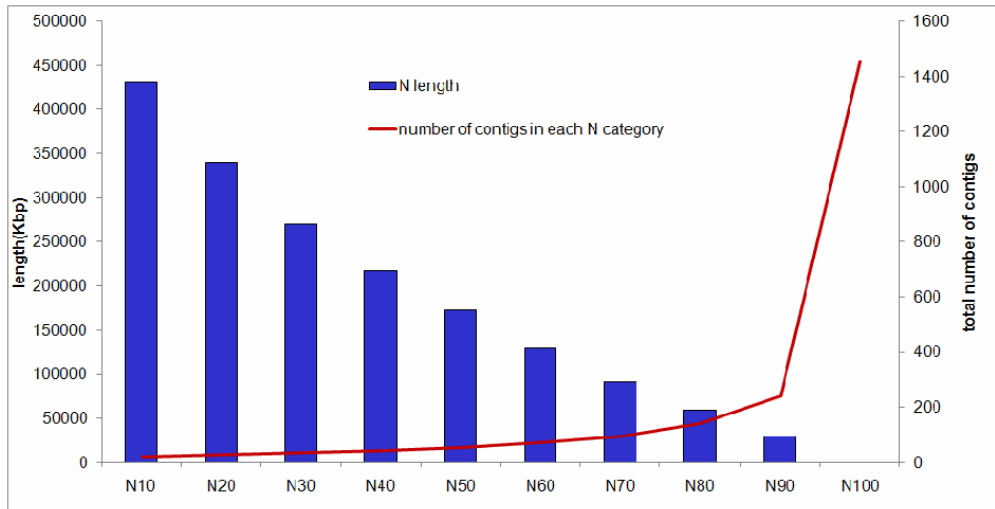

Figure S2.

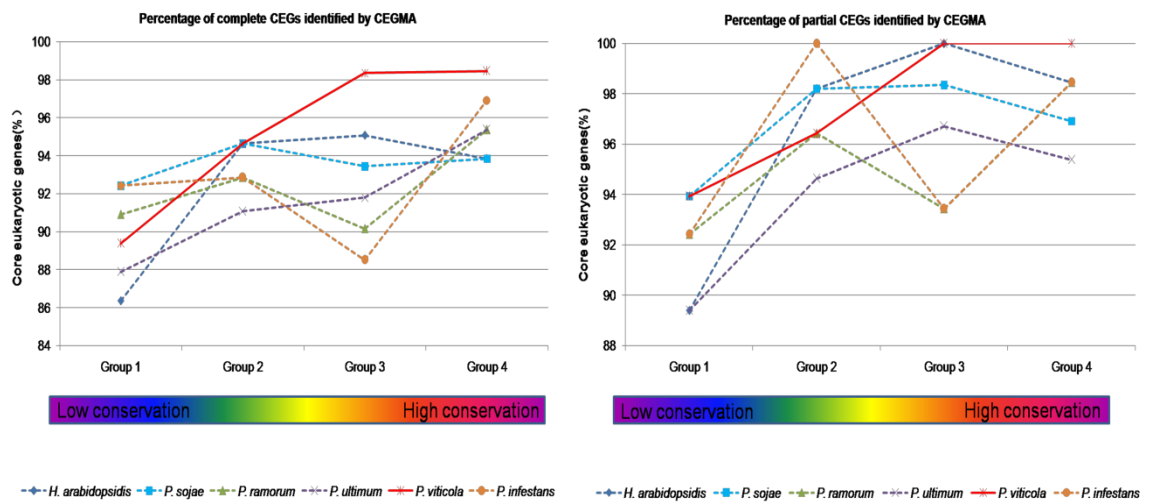

Figure S3.

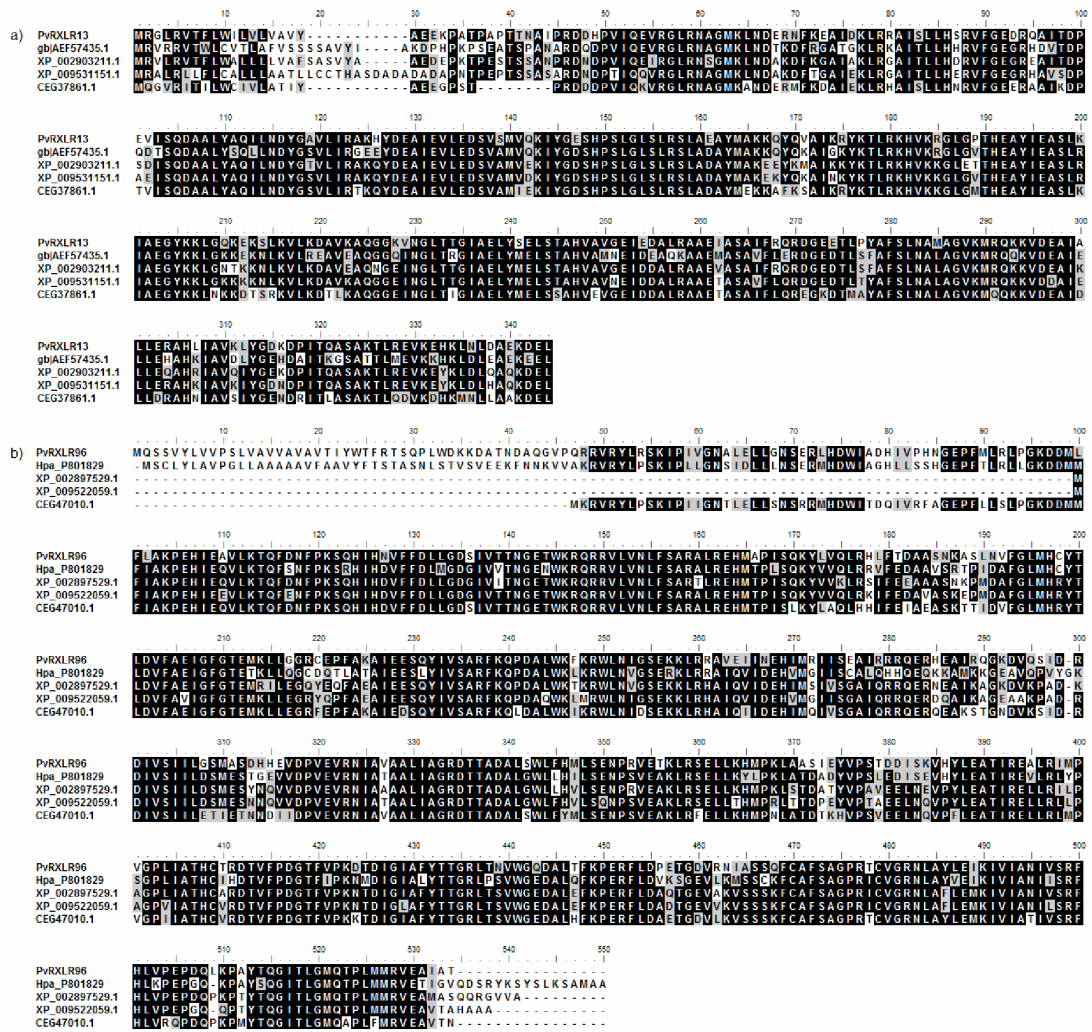

Figure S4.

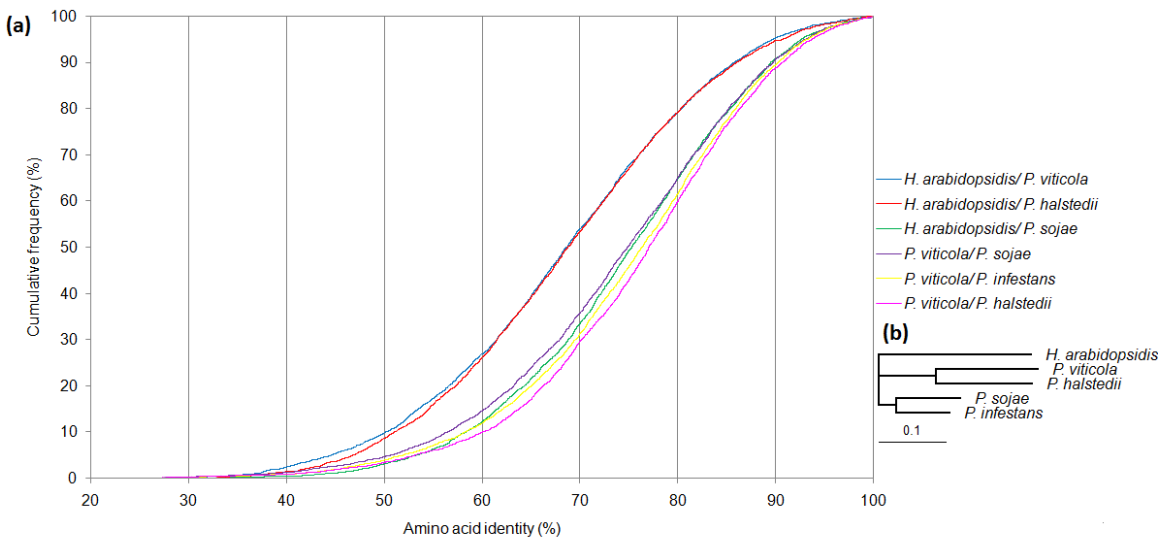

Supplement: srep46553-s1.pdf [file srep46553-s1.pdf]
